# Supplementary material for: Matrix Metalloproteinases and Subclinical Atherosclerosis in Chronic Kidney Disease: A Systematic Review
Source: Hindawi journal article supplement (doi:10.1155/2016/9498013), 2016-01-01
Supplement: f1 [file 9498013.f1.pdf]

Supplementary Table 1: Studies excluded from quantitative synthesis and reason for their exclusion

| # | Study                                          | Participants                                                       | Age                                                                   | MMPs                                               | Outcome                                      | Association in CKD/HD patients (magnitude)                                                                                                                                  | P value                 | Direction        | Details for exclusion                                   |
|---|------------------------------------------------|--------------------------------------------------------------------|-----------------------------------------------------------------------|----------------------------------------------------|----------------------------------------------|-----------------------------------------------------------------------------------------------------------------------------------------------------------------------------|-------------------------|------------------|---------------------------------------------------------|
| 1 | Fatema K.,(45)<br>Japan<br>(2004)              | Total: 70<br>CKD: 30<br>HTN: 40                                    | CKD: 62 ± 12<br>HTN: 60 ± 10                                          | MMP-1<br>TIMP-1<br>TIMP-1/MMP-1                    | CV-IBS                                       | <b>CV-IBS in CKD (after HD)</b><br>MMP-1: NR<br>TIMP-1: NR<br>TIMP-1/MMP-1: r= - 0.52                                                                                       | -<br>-<br><0.05         | -<br>-<br>↓      | Non-atherosclerosis specific outcome                    |
| 2 | Pawlak K.,(46)<br>Poland<br>(2005)             | Total: 68<br>HD: 50<br>Controls: 18                                | HD: 58.0 ± 13<br>Controls: 54 ± 7                                     | MMP-9<br>TIMP-1<br>TIMP-1/MMP-9                    | History of CVD                               | <b>History of CVD in HD</b><br>MMP-9: NR (unadjusted)<br>TIMP-1: NR (unadjusted)<br>TIMP-1/MMP-9 ratio: nr (unadjusted)                                                     | >0.05<br>>0.05<br>>0.05 | ↔<br>↔<br>↔      | Non – atherosclerosis specific outcome.                 |
| 3 | Peireskova M.,(47)<br>Czech Republic<br>(2009) | Total: 124<br>CKD: 80<br>Controls: 44                              | CKD: 52±16<br>Controls: 58±10                                         | MMP-2<br>PAPP-A                                    | History of CVD                               | <b>History of CVD in CKD</b><br>MMP-2: NR (unadjusted)<br>PAPP-A: NR (unadjusted)                                                                                           | <0.001<br><0.001        | ↑<br>↑           | Non – atherosclerosis specific outcome.                 |
| 4 | Chung A.,(38)<br>Canada<br>(2009)              | Total: 24<br>Diabetic CKD: 8<br>Non-Diabetic CKD: 8<br>Controls: 8 | Diabetic CKD: 55 ± 8<br>Non-Diabetic CKD: 57 ± 11<br>Controls: 50 ± 8 | MMP-2<br>MMP-9                                     | Arterial stiffness<br>Arterial calcification | <b>Arterial stiffness (PWV) in CKD</b><br>MMP-2+: MMP-9: r = 0.683 (unadjusted)<br><b>Arterial Calcification(Phosphate) in CKD</b><br>MMP-2+: MMP-9: r = 0.513 (unadjusted) | 0.005<br>0.04           | ↑<br>↑           | MMPs expression levels, not serum levels                |
| 5 | Chung A.,(37)<br>Canada<br>(2009)              | Total: 70<br>CKD: 17<br>HD: 23<br>Controls: 30                     | CKD:54 ± 2.6<br>HD: 49 ± 2.8<br>Controls:30                           | MMP-2                                              | Arterial stiffness<br>Calcium deposit        | <b>Arterial stiffness in CKD</b><br>MMP-2: r = 0.326<br><b>Arterial stiffness in HD</b><br>MMP-2: r = 0.384<br><b>Arterial stiffness in PD</b><br>MMP-2: r = 0.796          | 0.22<br>0.19<br>0.006   | ↔<br>↔<br>↑      | Not serum level of MMP-S, Expression levels in arteries |
| 6 | Pawlak K., (48)<br>Poland<br>(2010)            | Total: 88<br>PD: 70<br>Controls: 18                                | HD: 50.89<br>Controls: 47.94 ± 6.60                                   | MMP-2<br>MMP-9<br>TIMP-1<br>TIMP-2                 | History of CVD                               | <b>History of CVD in PD</b><br>MMP-2: β = 0.365 (adjusted)<br>MMP-9: NR<br>TIMP-1: NR<br>TIMP-2: β = 0.292 (adjusted)                                                       | 0.02<br>-<br>-<br>0.03  | ↑<br>-<br>-<br>↑ | Non – atherosclerosis specific outcome.                 |
| 7 | Sun Y.,(49)<br>China<br>(2012)                 | Total: 34<br>HD: 15<br>Controls: 19                                | HD: 62.6 ± 10.3<br>Controls: 60.1 ± 10.5                              | MMP-2<br>MMP-9<br>TIMP-2<br>TIMP-3<br>MMP-2/TIMP-2 | cIMT<br>Atherosclerosis Score                | <b>cIMT</b><br>MMP-2/TIMP-2: OR: 16.43 (2.02-18.37)<br><b>Coronary Atherosclerosis Score</b><br>MMP-2/TIMP-2: OR: 5.57 (1.32-7.59)                                          | <0.01<br>0.01           | ↑<br>↑           | Not serum level of MMP-S, Expression levels in veins    |

CKD: Chronic Kidney Disease, HD: Hemodialysis, PD: Peritoneal Dialysis, HTN: Hypertension, CVD: Cardiovascular Disease, MMP: Metalloproteinases, cIMT: carotid Intima Media Thickness, CV-IBS: cardiac cycle-dependent variation of ultrasonic integrated backscatter, r: Correlation, OR: Odds Ratio, β: Regression Coefficient, nr: non-reported
